# Supplementary material for: Polyclonal epitope mapping reveals temporal dynamics and diversity of human antibody responses to H5N1 vaccination
Source: PubMed Central journal article supplement (PMC7888560; doi:10.1016/j.celrep.2020.108682), 2021-01-26
Supplement: NIHMS1667159-supplement-1.pdf [file NIHMS1667159-supplement-1.pdf]

**Cell Reports, Volume 34**

**Supplemental Information**

**Polyclonal epitope mapping reveals  
temporal dynamics and diversity of human  
antibody responses to H5N1 vaccination**

**Julianna Han, Aaron J. Schmitz, Sara T. Richey, Ya-Nan Dai, Hannah L. Turner, Bassem M. Mohammed, Daved H. Fremont, Ali H. Ellebedy, and Andrew B. Ward**

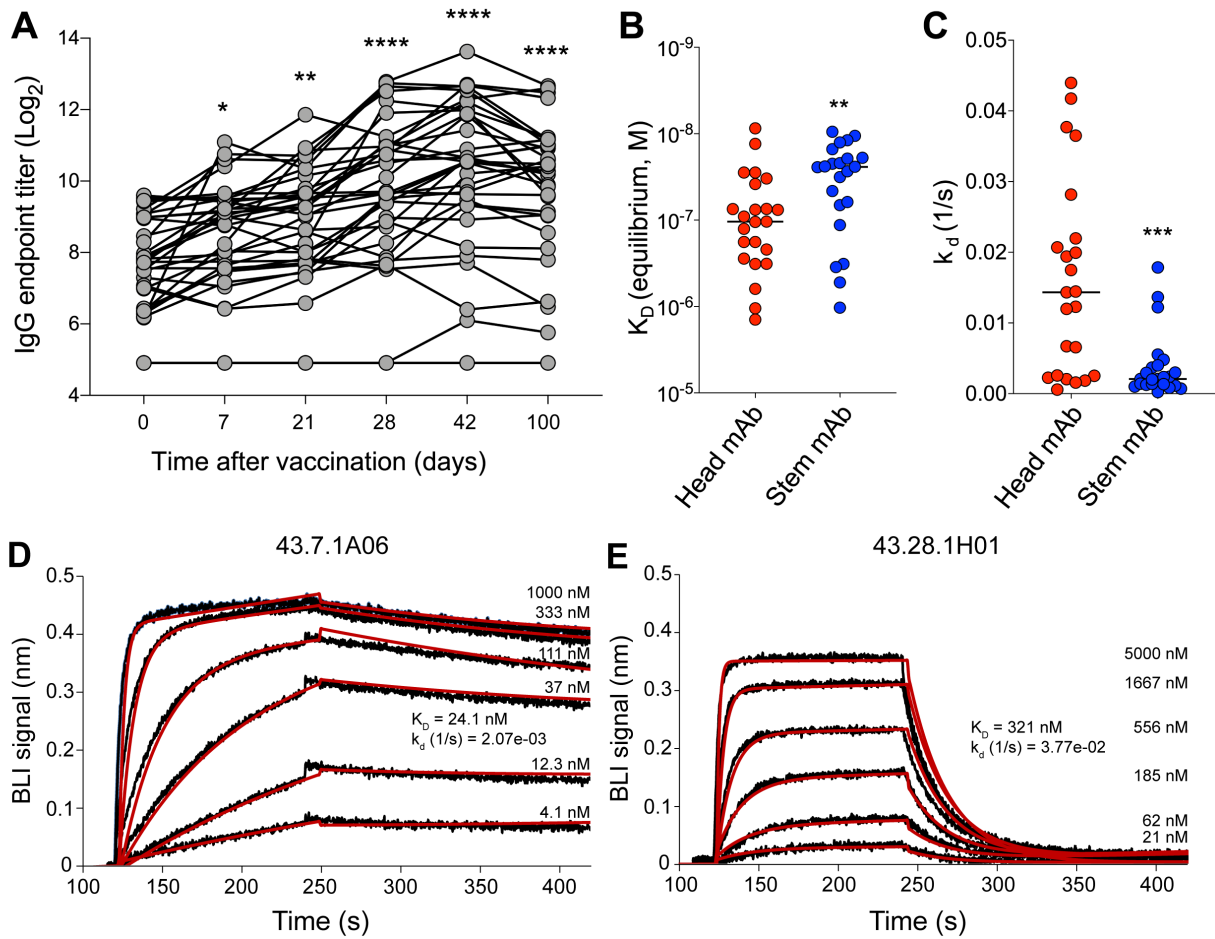

**Supplemental Figure 1. Related to Figure 1. Affinity assessment of mAbs from subjects 4, 28, 36, and 43.**

(A) ELISA binding titers of serum IgG to recombinant H5 HA over the course of vaccination. (B-C) affinity measurements (B) and off-rates (C) of H5 HA stem- (blue) and head-specific (red) plasmablast-derived monoclonal Fab fragments isolated at days 7 and 28 binding to recombinant H5 HA. (D-E) Representative biolayer interferometry (BLI) binding curves of monoclonal Fab fragments 1A06 (D) and 1H01 (E) isolated from subject 43 at days 7 and 28 binding to recombinant H5 HA. p-values were determined by unpaired t tests: \* p-value  $< 0.05$ , \*\* p-value  $< 0.01$ , \*\*\* p-value  $< 0.001$ , \*\*\*\* p-value  $< 0.0001$ , N.S. non-significant.

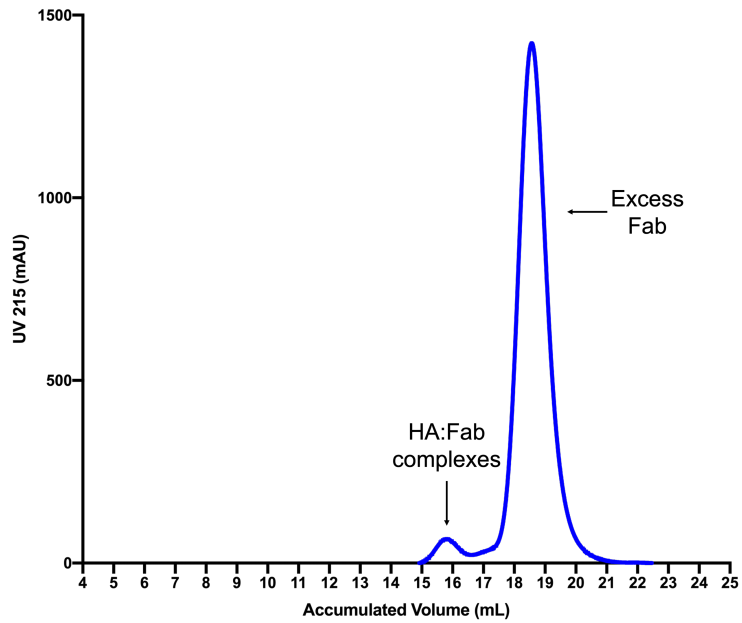

**Supplemental Figure 2. Related to Figure 2. Purification of polyclonal immune complexes.** (A) Example chromatogram from size exclusion chromatography separation of polyclonal immune complexes. Peaks corresponding to elution of immune complexes and excess Fab are labeled.

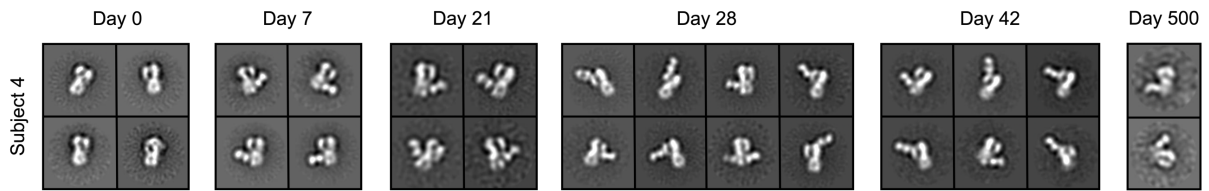

**Supplemental Figure 3. Related to Figure 3. Subject 4 2D class averages over the course of H5N1 vaccination.**

(A) Example 2D class averages of immune complexes or unbound H5 HA at corresponding time points after H5N1 vaccination in subject 4.

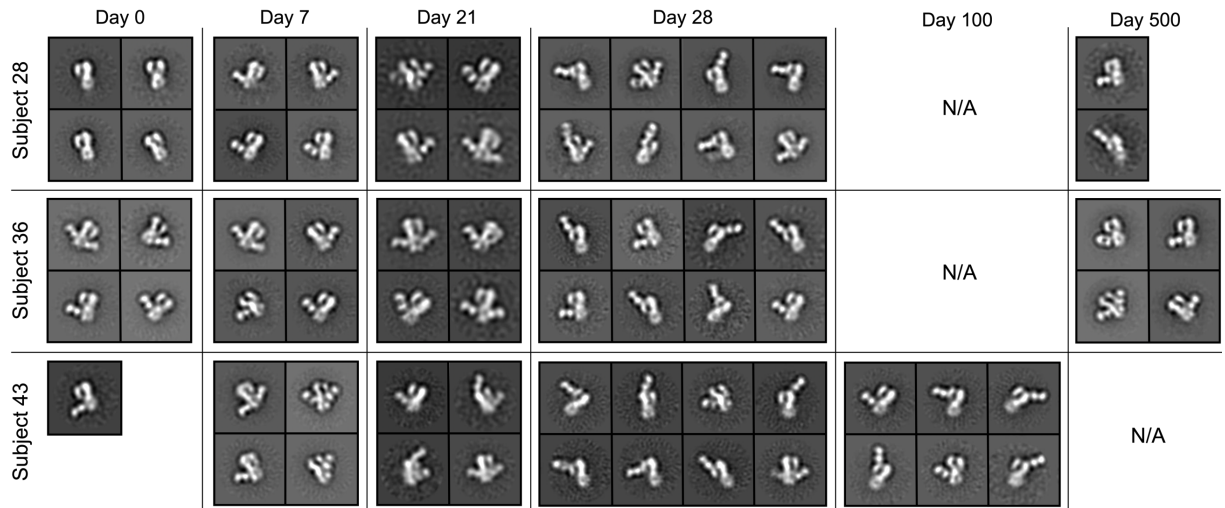

**Supplemental Figure 4. Related to Figure 4. Subjects 28, 36, and 43 2D class averages over the course of H5N1 vaccination.**

(A) Example 2D class averages of immune complexes or unbound H5 HA at corresponding time points after H5N1 vaccination in subjects 28, 36, and 43.

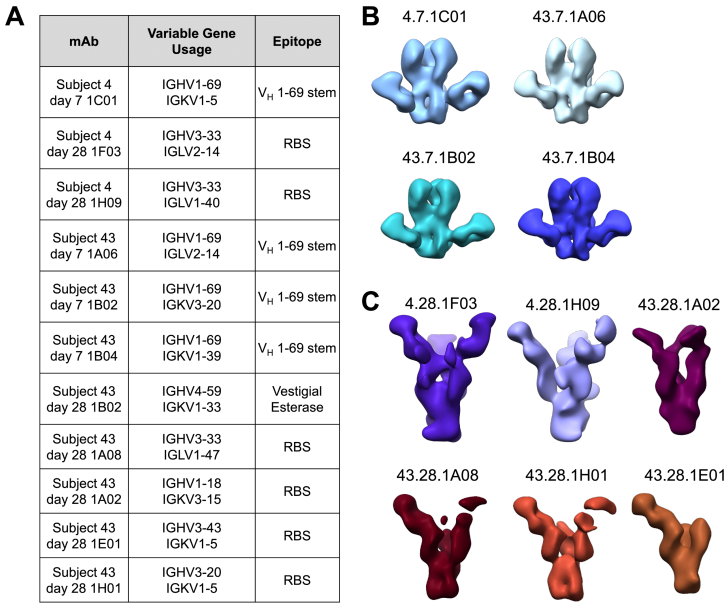

**Supplemental Figure 5. Related to Figure 5. Subject 43 mAbs target discrete regions on HA.**

(A) Table of mAbs isolated from plasmablasts of subjects 4 and 43. Variable gene usages and EM-mapped epitopes are listed. (B-C) 3D reconstructions of immune complexes from day 7 (B) or day 28 (C) plasmablasts with recombinant H5 HA (A/Indonesia/5/2005).

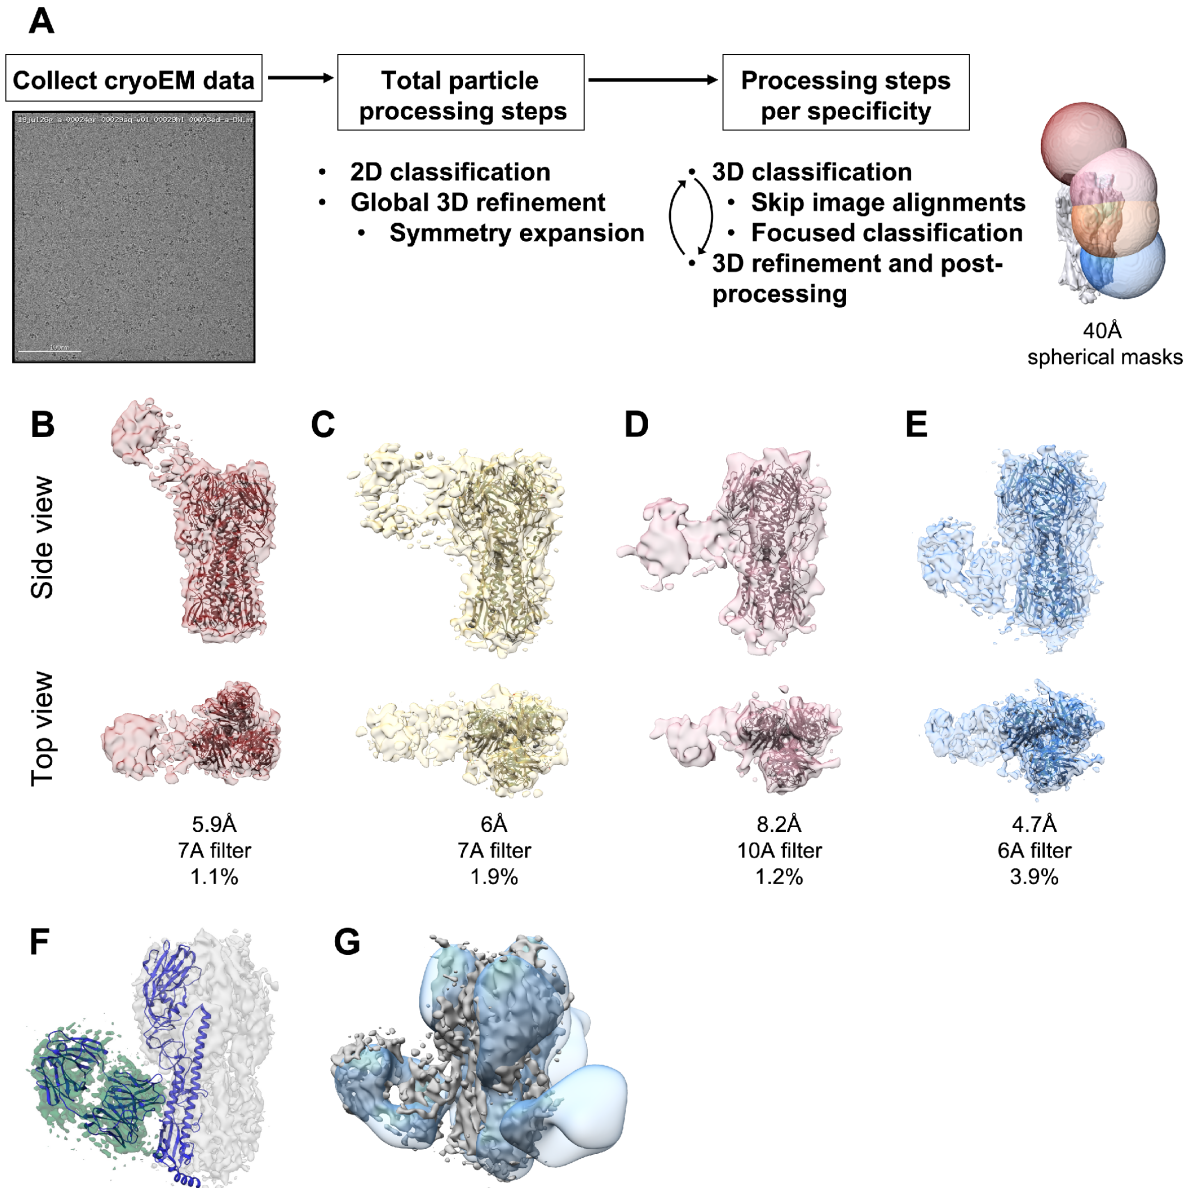

**Supplemental Figure 6. Related to Figure 6. CryoEM maps of polyclonal immune complexes.**

(A) Workflow of cryoEM focused classification and refinement: Briefly, after cryoEM data collection and initial processing steps, particles are classified and cleaned in 2D. All particles are masked around the HA trimer, aligned to a reference HA trimer (PDB 4K62), and C3 symmetry expanded. For focused classification, particles are classified in 3D without global image alignment using a 40 Å spherical mask around regions of anticipated pAbs. For focused refinement, 3D classes of individual immune complexes are further refined with a mask around the immune complex. Final maps of specific immune complexes are then produced from multiple iterations of focused classification and refinement. Scale bar on micrograph denotes 100nm. (B-E) CryoEM maps of pAbs in complex with recombinant H5 HA (A/Indonesia/5/2005). Maps were low-pass filtered to 9Å for the RBS-specific (B), 8Å for the lateral patch-specific (C), 10Å for the vestigial esterase-specific (D), and 6Å for the stem-specific (E) immune complexes. (F) CryoEM map of

stem-specific immune complex in gray and green with CR9114 ribbon diagram docked into EM density (PDB 4FQI). (G) CryoEM map of stem-specific immune complex in grey compared with subject 4 day 7 mAb 1C01 complexed with H5 HA in blue.



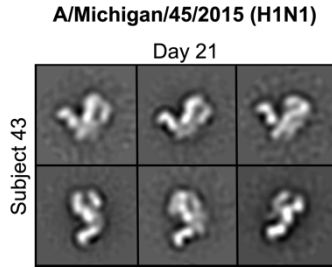

**Supplemental Figure 7. Related to Figure 7. Subject 43 2D class averages of immune complexes with heterosubtypic H1 HA.**

(A) Example 2D class averages of H1 HA (A/Michigan/45/2015) immune complexes at day 21 in subject 43.
